NOVEMBER 2020 | VOLUME 71 | NUMBER 11

# Psychiatric Services

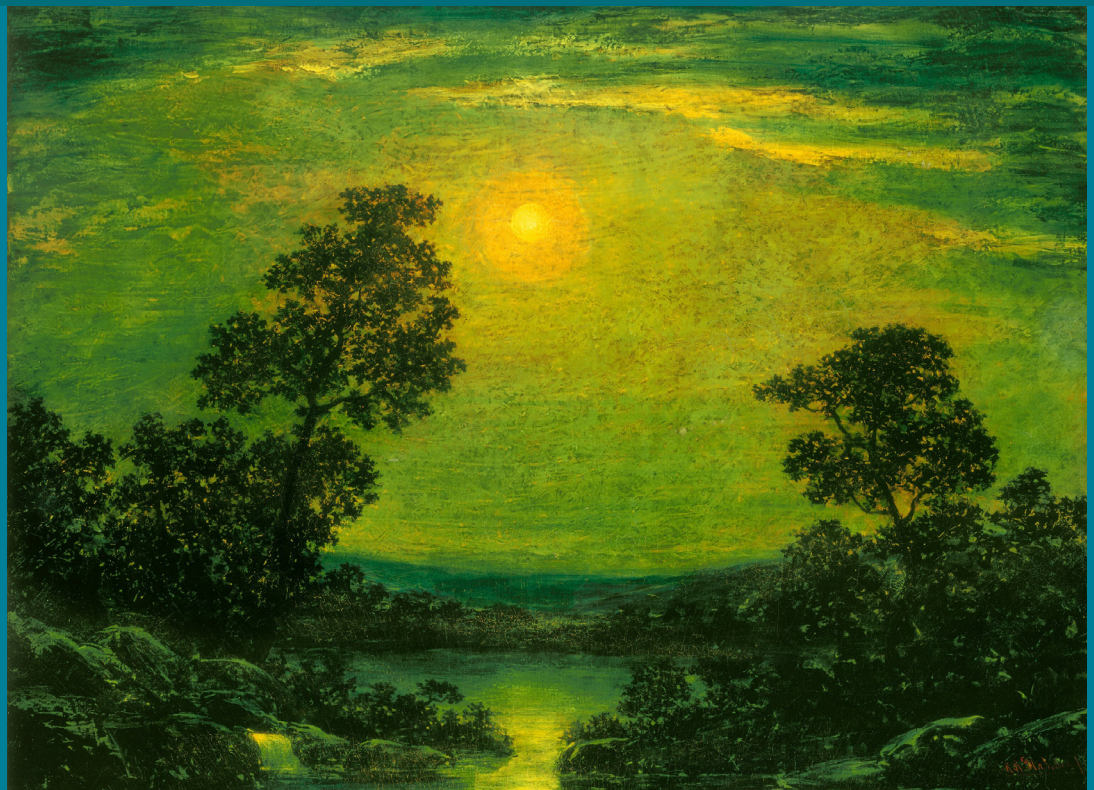

Mental health policy in the era of COVID-19

Youth mental health: patterns of service use, smartphone apps for college

Open Forum: managing mental health clinicians' public selves

Patients' concerns about COVID-19

AMERICAN  
**PSYCHIATRIC**  
ASSOCIATION

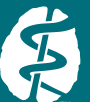

[ps.psychiatryonline.org](http://ps.psychiatryonline.org)
